# Supplementary material for: Non-Vitamin K Antagonist Oral Anticoagulants versus Low Molecular Weight Heparin for Cancer-Related Venous Thromboembolic Events: Individual Patient Data Meta-Analysis
Source: MDPI journal article supplement (doi:10.3390/cancers15245887), 2023-12-18

Supplementary Figure S1: Risk of bias assessment of included studies

| Study           | Risk of bias domains |    |    |    |    |         |
|-----------------|----------------------|----|----|----|----|---------|
|                 | D1                   | D2 | D3 | D4 | D5 | Overall |
| Agno 2019       |                      |    |    |    |    |         |
| Agnelli 2015    |                      |    |    |    |    |         |
| Guntupalli 2020 |                      |    |    |    |    |         |
| Kim 2022        |                      |    |    |    |    |         |
| McBane 2019     |                      |    |    |    |    |         |
| Mokadem 2021    |                      |    |    |    |    |         |
| Planquette 2022 |                      |    |    |    |    |         |
| Raskob 2018     |                      |    |    |    |    |         |
| Wang 2019       |                      |    |    |    |    |         |
| Young 2018      |                      |    |    |    |    |         |
| Agnelli 2020    |                      |    |    |    |    |         |

Domains:

D1: Bias arising from the randomization process.

D2: Bias due to deviations from intended intervention.

D3: Bias due to missing outcome data.

D4: Bias in measurement of the outcome.

D5: Bias in selection of the reported result.

Judgement

Some concerns

Low

Supplementary Data S1: EMBASE Search Strategy

|          |                                                                                                                                                                                                                                                                                                                                                                                                                                                                  |
|----------|------------------------------------------------------------------------------------------------------------------------------------------------------------------------------------------------------------------------------------------------------------------------------------------------------------------------------------------------------------------------------------------------------------------------------------------------------------------|
| <b>1</b> | 'neoplasm':ti,ab OR 'cancer*':ti,ab OR 'tumo*':ti,ab OR 'malign*':ti,ab or "neoplasm"/exp                                                                                                                                                                                                                                                                                                                                                                        |
| <b>2</b> | ((vein* or venous* or deep-vein* or deep-veno*) NEAR/3 (occlu* or thrombo* or block* or stasis*)):ti,ab                                                                                                                                                                                                                                                                                                                                                          |
| <b>3</b> | "venous thromboembolism"/exp or "vein thrombosis"/exp or "lung embolism"/exp or "occlusive cerebrovascular disease "/exp or "budd chiari syndrome"/exp or "postthrombosis syndrome"/exp or "vein occlusion"/exp or "phlegmasia alba dolens"/exp or "Lemierre syndrome"/exp                                                                                                                                                                                       |
| <b>4</b> | ("pulmonary embolism" or "Phlebothrombosis" or "budd-chiari syndrome" or "hepatic venous outflow obstruction" or "chiaris syndrome " or "chiari syndrome" or "postthrombotic syndrome" or "Thrombophlebit*" or "phlegmasia alba dolens" or "lemierre disease" or "lemierre syndrome" or "lemierres disease" or "lemierres syndrome" or "postanginal sepsis " or "paget-schroetter syndrome" or "paget schroetter" or "thromboembolism"):ti,ab                    |
| <b>5</b> | "blood clotting inhibitor"/exp OR 'new oral anticoagulant'/exp OR 'novel oral anticoagulant'/exp OR 'blood clotting factor 10a inhibitor'/exp OR ('apixaban*' OR 'betrixaban*' OR 'edoxaban*' OR 'rivaroxaban*' OR 'dabigatran*' or "Xarelto" or "BAY 59-7939" or "BMS 562247" or "BMS-562247" or "Xa inhibitor" or "Melagatran" or "Ximelagatran" or "Exanta" or "H 376 95" or "H 376-95" or "DU-176b" or "xi-melagatran" or "BMS562247" or "asundexian"):ti,ab |
| <b>6</b> | 'low molecular weight heparin'/exp OR ('lmwh' OR 'enoxaparin' OR 'nadroparin' OR 'tinzaparin' OR 'dalteparin'):ti,ab                                                                                                                                                                                                                                                                                                                                             |

1 AND (2 OR 3 OR 4) AND 5 AND 6, limit to RCTs

VTE recurrence – Raskob 2018 original

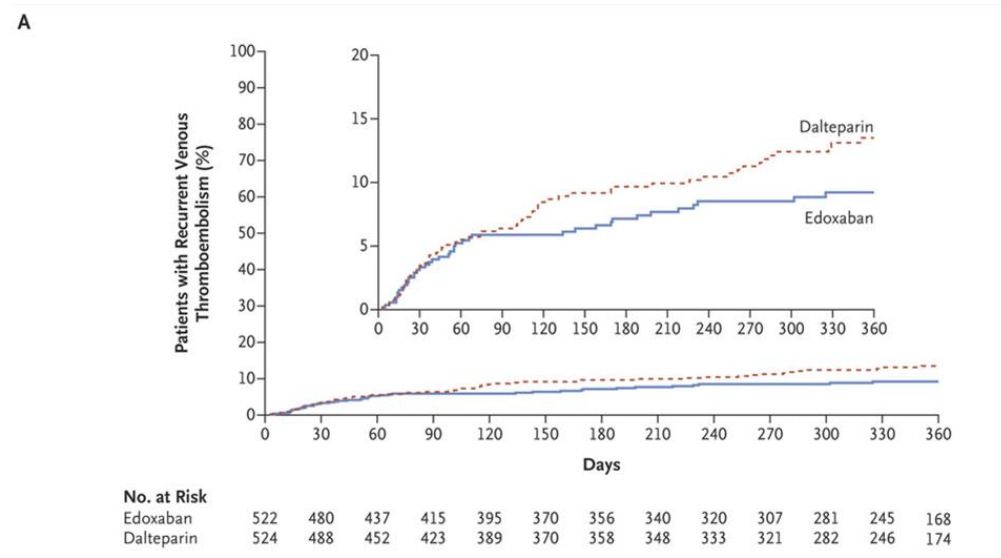

VTE recurrence – Raskob 2018 reconstructed

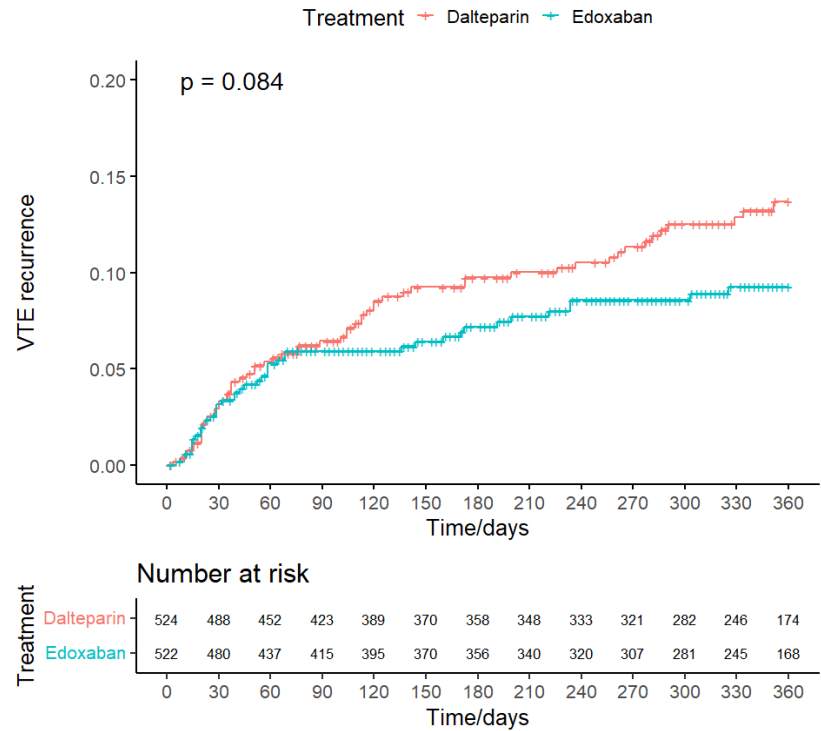

## VTE recurrence – Agnelli 2020 original

### A Recurrent Venous Thromboembolism

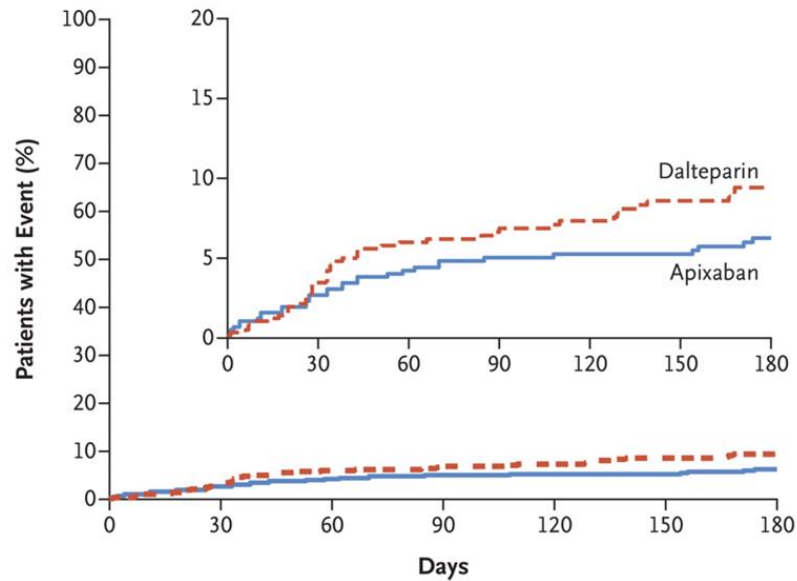

#### No. at Risk

|            |     |     |     |     |     |     |     |
|------------|-----|-----|-----|-----|-----|-----|-----|
| Dalteparin | 579 | 507 | 462 | 417 | 383 | 352 | 217 |
| Apixaban   | 575 | 522 | 481 | 453 | 424 | 399 | 241 |

## VTE recurrence – Agnelli 2020 reconstructed

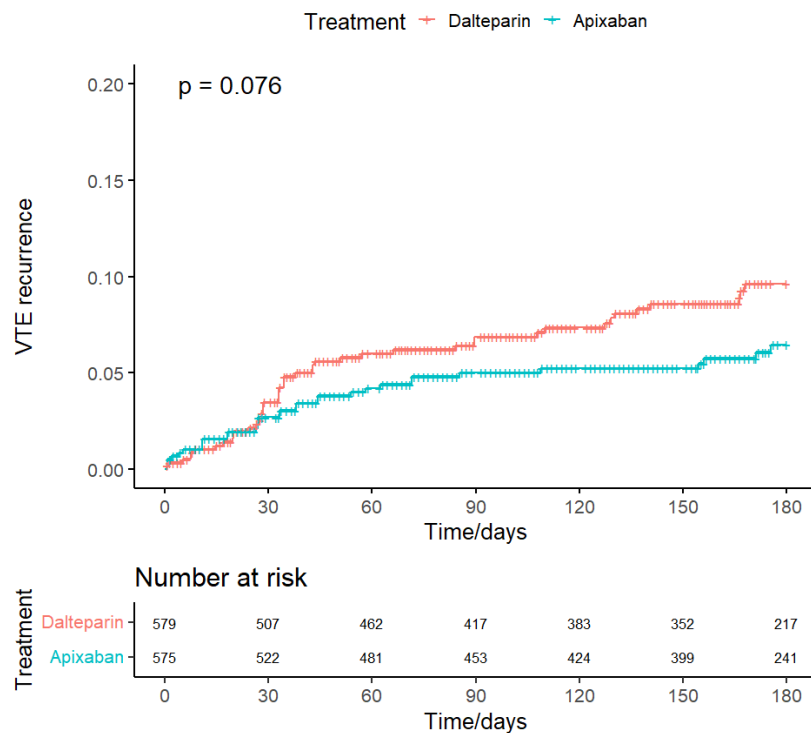

## VTE recurrence – Young 2018 original

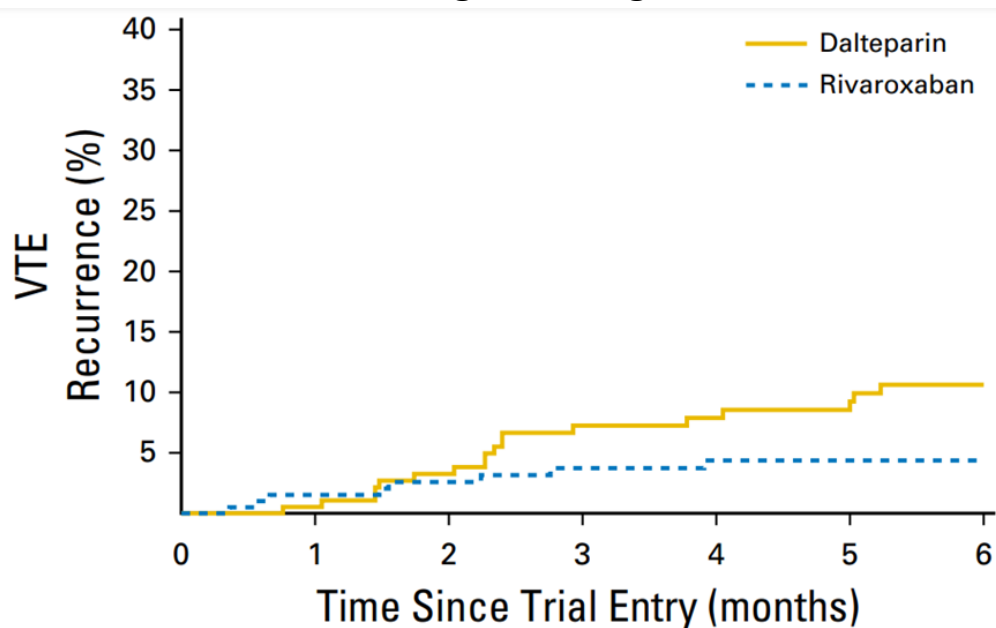

No. at risk:

|             |     |     |     |     |
|-------------|-----|-----|-----|-----|
| Dalteparin  | 203 | 171 | 139 | 115 |
| Rivaroxaban | 203 | 174 | 149 | 134 |

## VTE recurrence – Young 2018 reconstructed

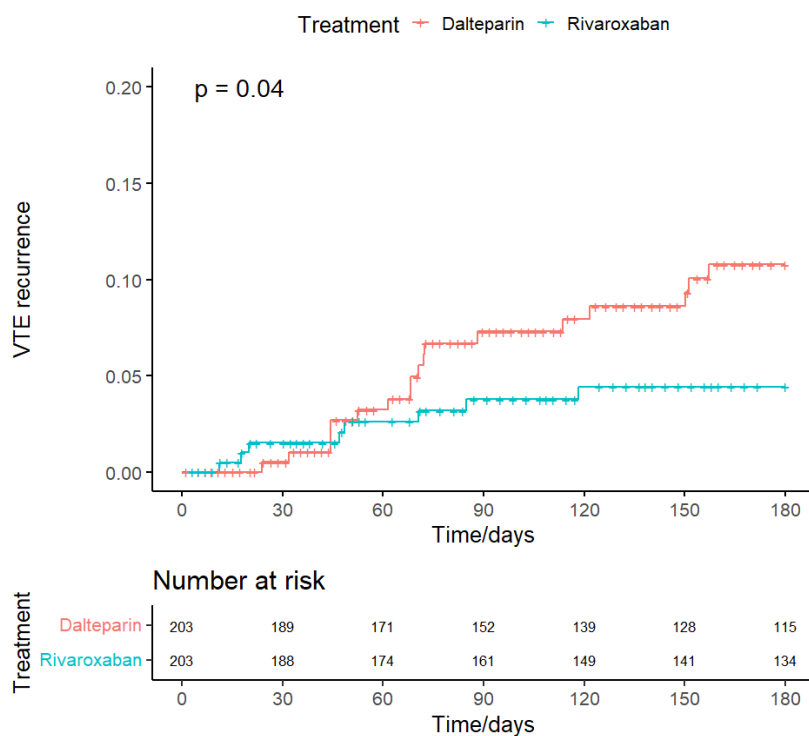

## Major bleeding – Agnelli 2020 original

**B Major Bleeding**

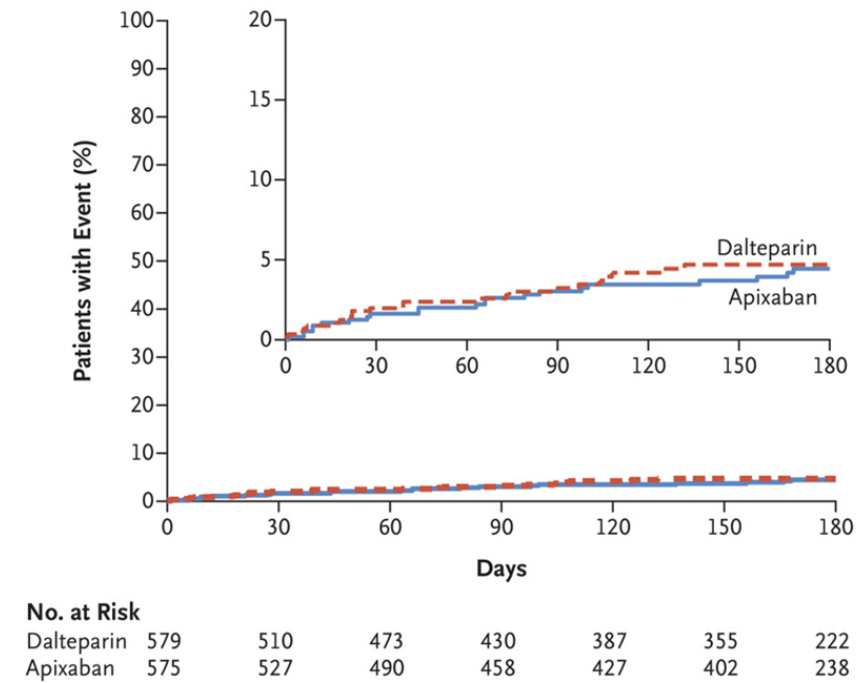

## Major bleeding – Agnelli 2020 reconstructed

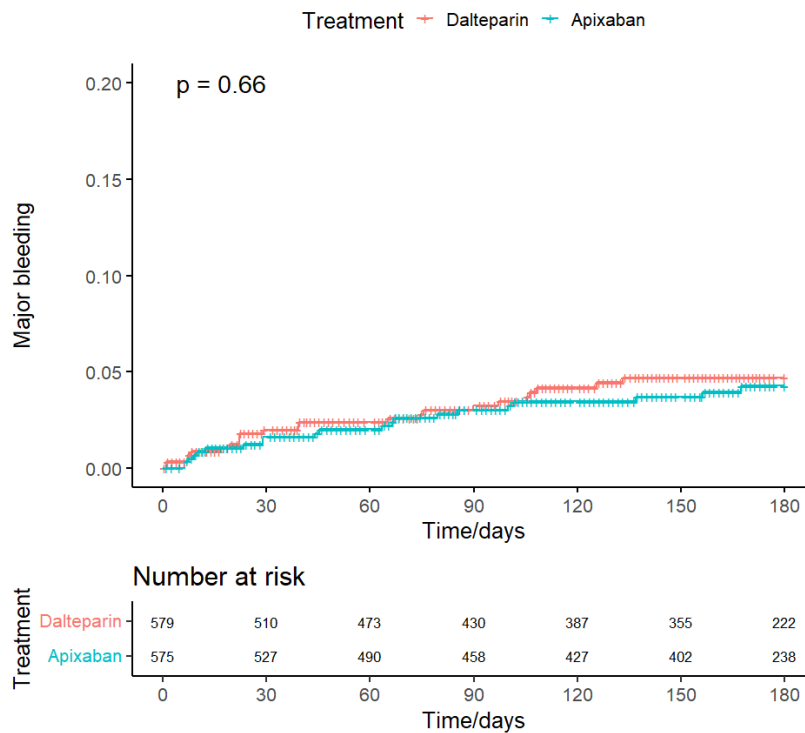

# Major bleeding – Raskob 2018 original

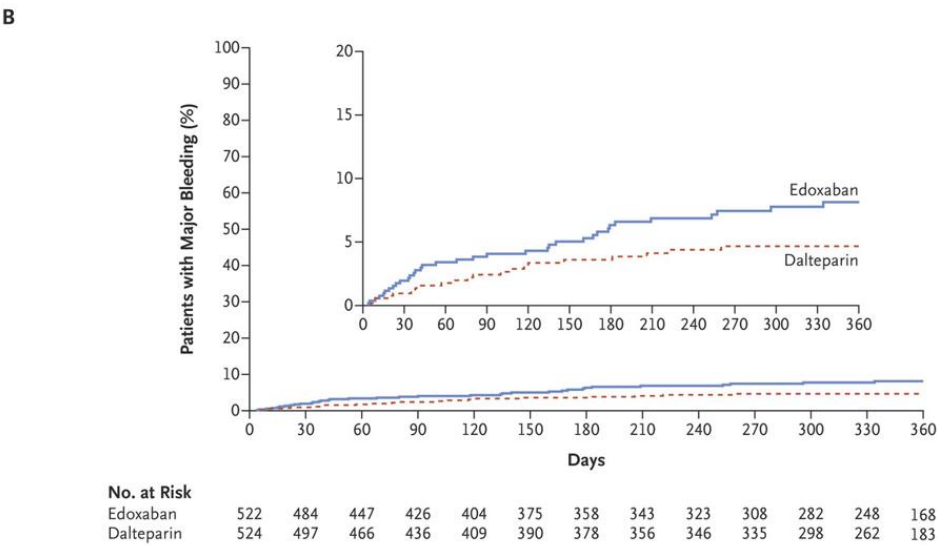

# Major bleeding – Raskob 2018 reconstructed

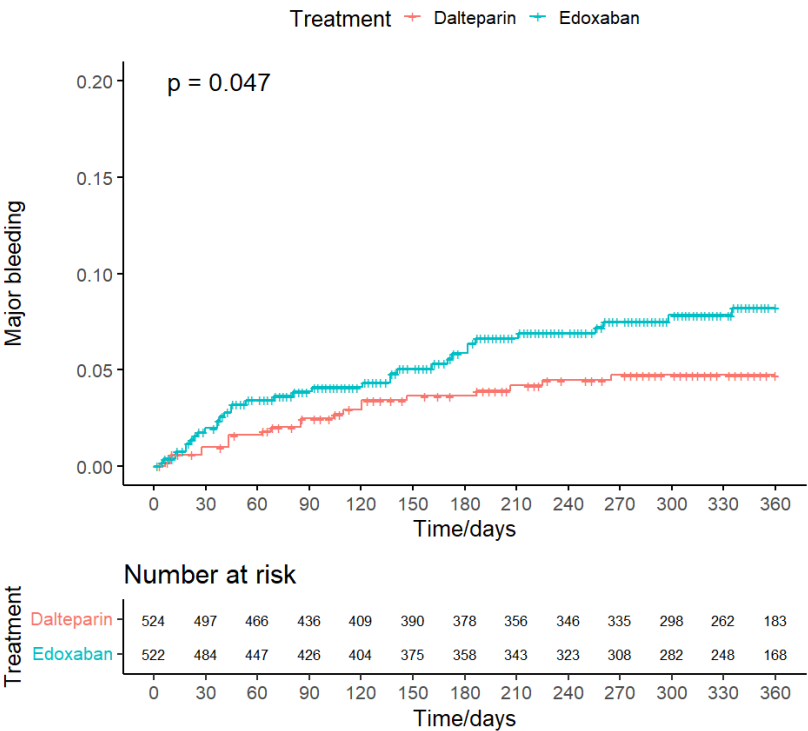

Supplementary Data 3: Forest plots of other meta-analysed outcomes

## Forest plot of death due to pulmonary embolism

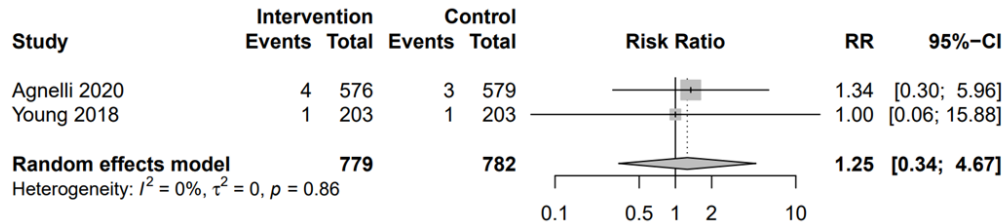

## Forest plot of death due to bleeding

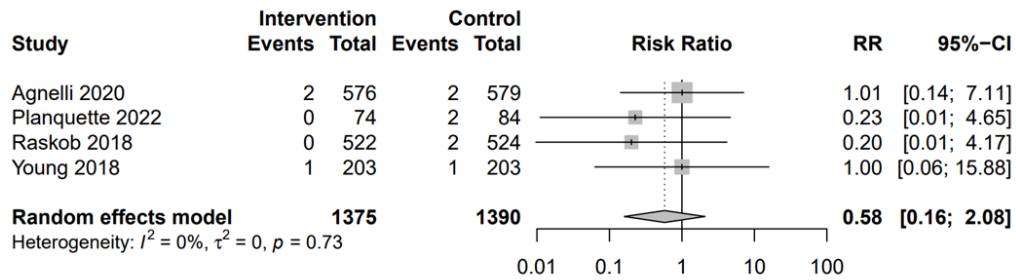



## Forest plot of death due to venous thromboembolism

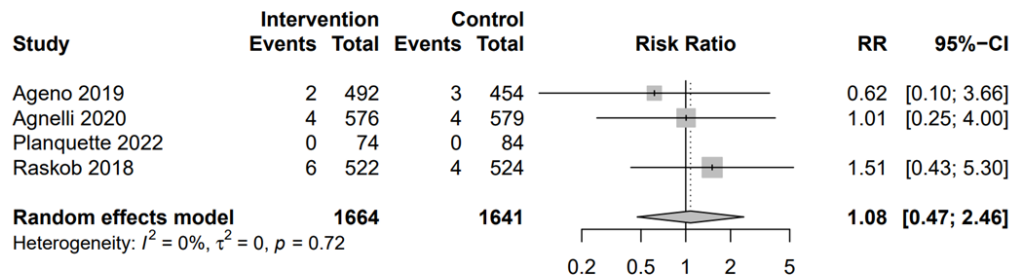

## Forest plot of death outcomes

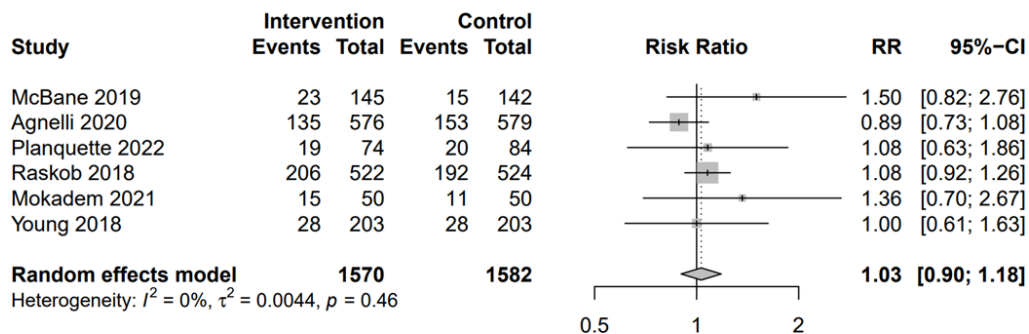

## Forest plot of clinically relevant non-major bleeding outcomes

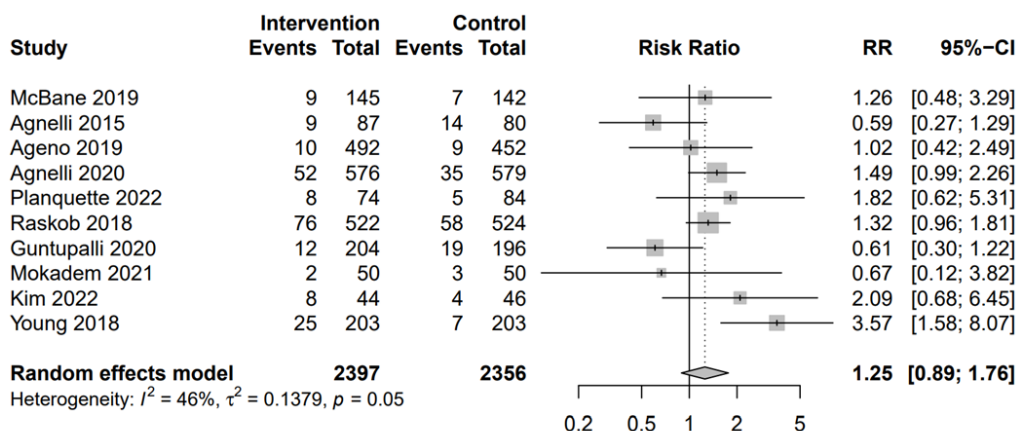

## Forest plot of major or clinically relevant non-major bleeding outcomes

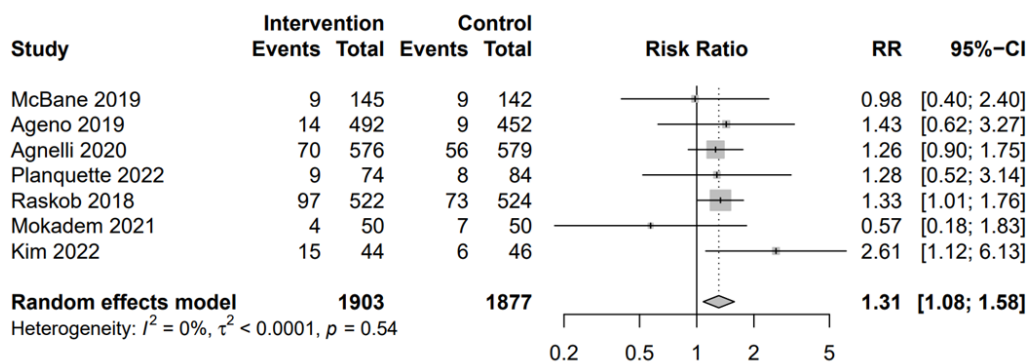

## Forest plot of non-fatal pulmonary embolism outcomes

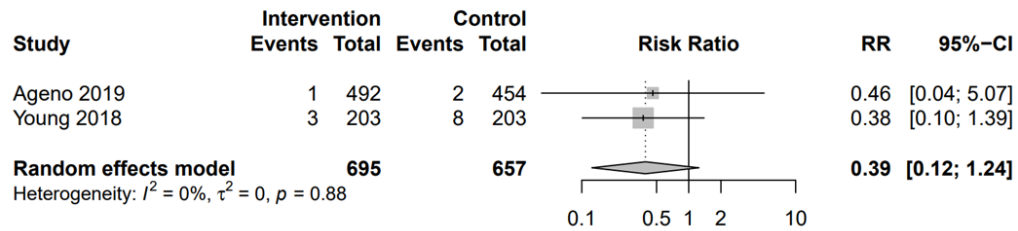

## Forest plot of fatal pulmonary embolism outcomes

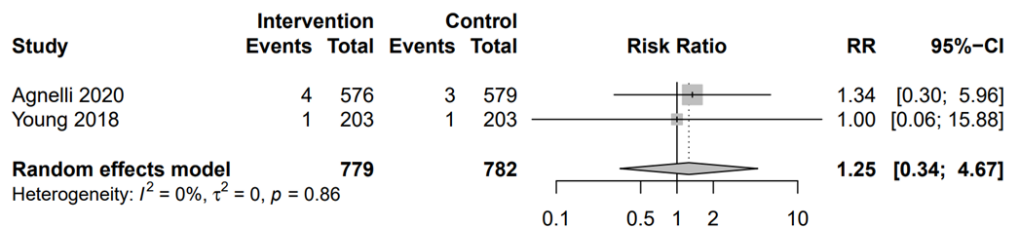

## Forest plot of venous thromboembolism outcomes

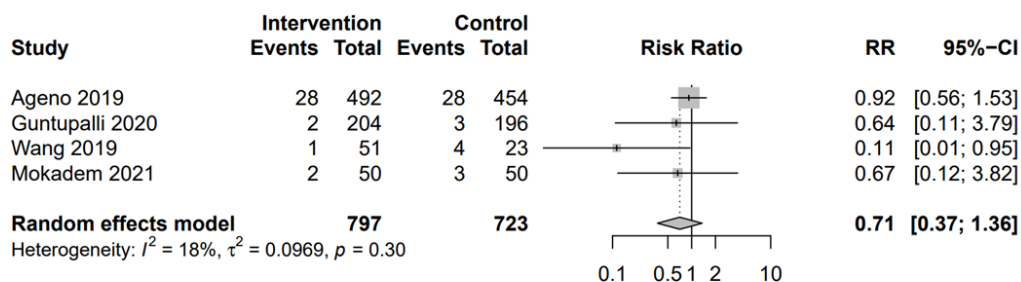

## Forest plot of recurrent pulmonary embolism outcomes

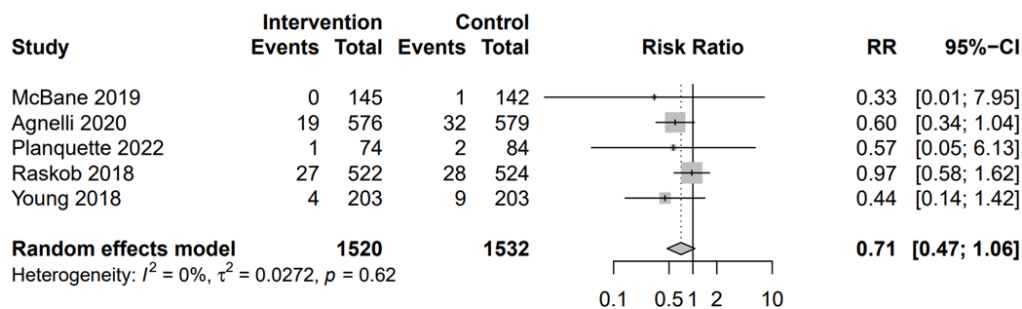

Supplement: s1 [file s1]
